# Supplementary material for: Spatial transcriptomics reveals a low extent of transcriptionally active hepatitis B virus integration in patients with HBsAg loss
Source: PubMed Central journal article supplement — Gut. 2023 Nov 15;73(5):797–809. doi: 10.1136/gutjnl-2023-330577 (PMC11041573; doi:10.1136/gutjnl-2023-330577), 2023-11-15
Supplement: gutjnl-2023-330577supp001.pdf [file gutjnl-2023-330577supp001.pdf]

## **Spatial transcriptomics reveals a low extent of transcriptionally active hepatitis B virus integration in patients with HBsAg loss**

Xiaoqi Yu, Qiming Gong, Demin Yu, Yongyan Chen, Ying Jing, Fabien Zoulim, Xinxin Zhang

### **Table of contents:**

Supplementary methods

Fig.S1

Fig.S2

Fig.S3

Fig.S4

Fig.S5

Table S1

Table S2

Table S3

## Supplementary methods

### Liver samples preparation

The spot diameter on the Visium Spatial Gene Expression Slide in this study was 55  $\mu\text{m}$ , and each section contains up to 5000 gene expression spots in the capture area (6.5 mm by 6.5 mm). Each spot with primers that include Illumina TruSeq Read 1 (partial read 1 sequencing primer), 16-nucleotide (nt) spatial barcode (all primers in a specific spot share the same spatial barcode), 12-nt UMI; 30-nt poly(dT) sequence (captures polyadenylated mRNA for cDNA synthesis). The frozen samples were sectioned at 10 $\mu\text{m}$  thickness. The integrity of RNA was tested and RNA integrity number (RIN)  $\geq 7$  is qualified.

### Optimization of permeabilization time

Tissue sections were placed on seven capture areas on a Visium Tissue Optimization slide. The sections were fixed, stained, and then permeabilized for different times ranging from 6 to 24 mins. The mRNA released during permeabilization binds to oligonucleotides in the capture areas. Fluorescent cDNA was synthesized on the slide and imaged. The permeabilization time that results in the maximum fluorescence signal with the lowest signal diffusion was optimal. The permeabilization time was 12 mins in this study.

### Tissue fixation, staining, and imaging

Tissue sections on the Visium Slide were fixed using methanol, stained with hematoxylin-eosin, and then the stained tissue sections were imaged.

### Tissue permeabilization and cDNA synthesis

A permeabilization enzyme was used for permeabilizing the tissue sections on the slide for incubating for the predetermined permeabilization time. The polyadenylated mRNA released from the overlying cells was captured by the primers on the spots. Incubation

with RT Master Mix with the reverse transcription reagents produces spatially barcoded full-length cDNA from polyadenylated mRNA on the slide. Second Strand Mix was added to the tissue sections on the slide to initiate second strand synthesis. After denaturation, cDNA from each capture area was transferred to a corresponding tube for amplification and library construction.

### **Visium spatial gene expression library construction**

A quantitative polymerase chain reaction (qPCR) using cDNA Primers was performed to determine the optimal number of PCR cycles needed. After determination, cDNA Amplification Mix was added to the remaining cDNA sample from denaturation for cDNA amplification, the product was then purified. Fragmentation was performed to purify the cDNA sample. P5, P7, i7, and i5 sample indexes and TruSeq Read 2 (read 2 primer sequence) were added via End Repair, A-tailing, Adaptor Ligation, and PCR. The final libraries contain the P5 and P7 primers used in Illumina amplification.

Fig.S1. Diagram of Visium Spatial Expression Slide for 18 patients

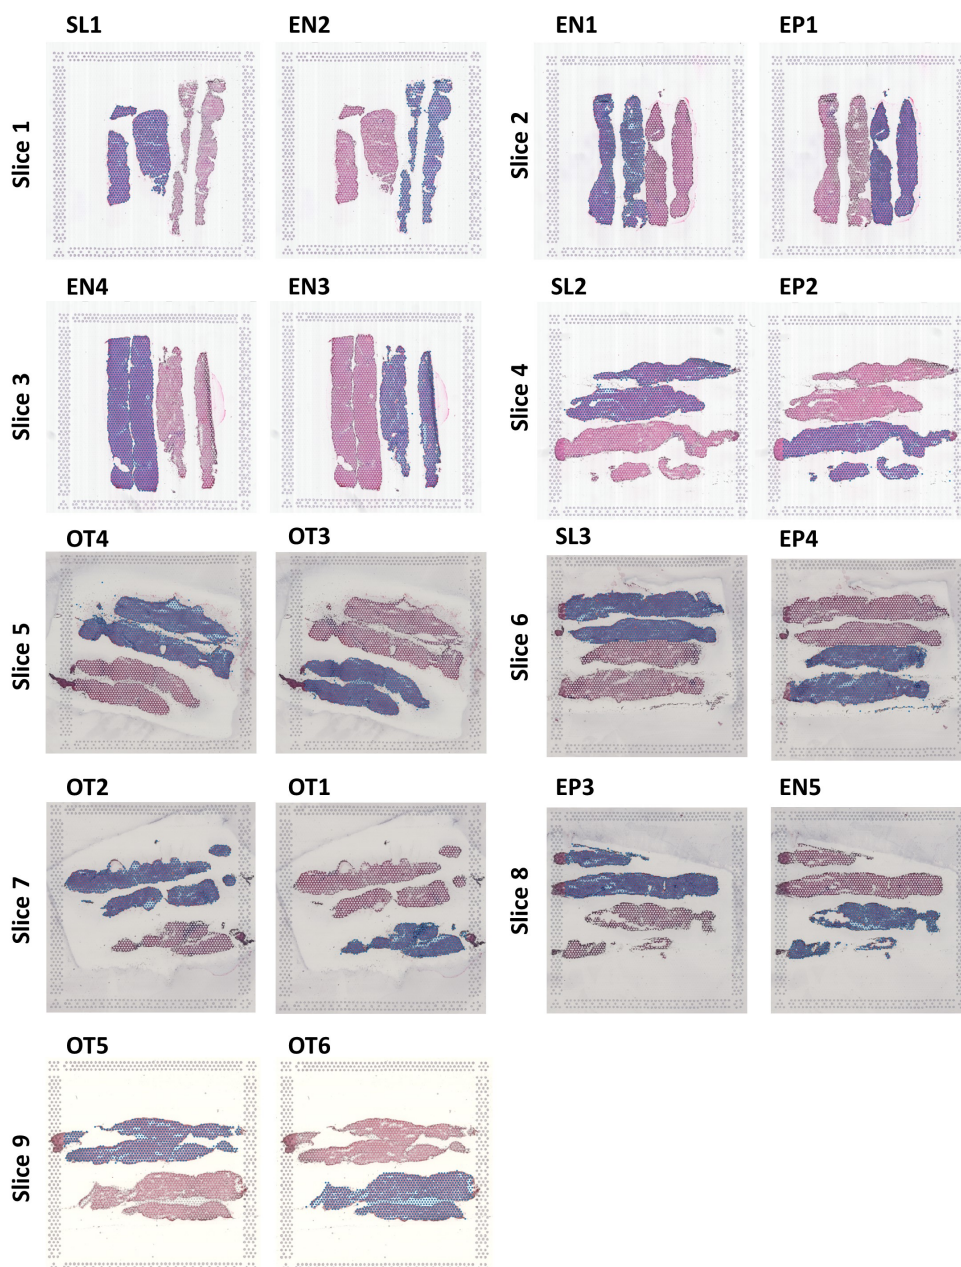

Each section contains liver biopsy tissues from two patients. Spots highlighted in blue represent the corresponding areas of liver tissue from the patient labeled in the figure. EP, HBeAg-positive; EN, HBeAg-negative; OT, on-treatment; SL, HBsAg loss.

Fig.S2 Spatial distribution and the density of HBV-host unique chimeric reads

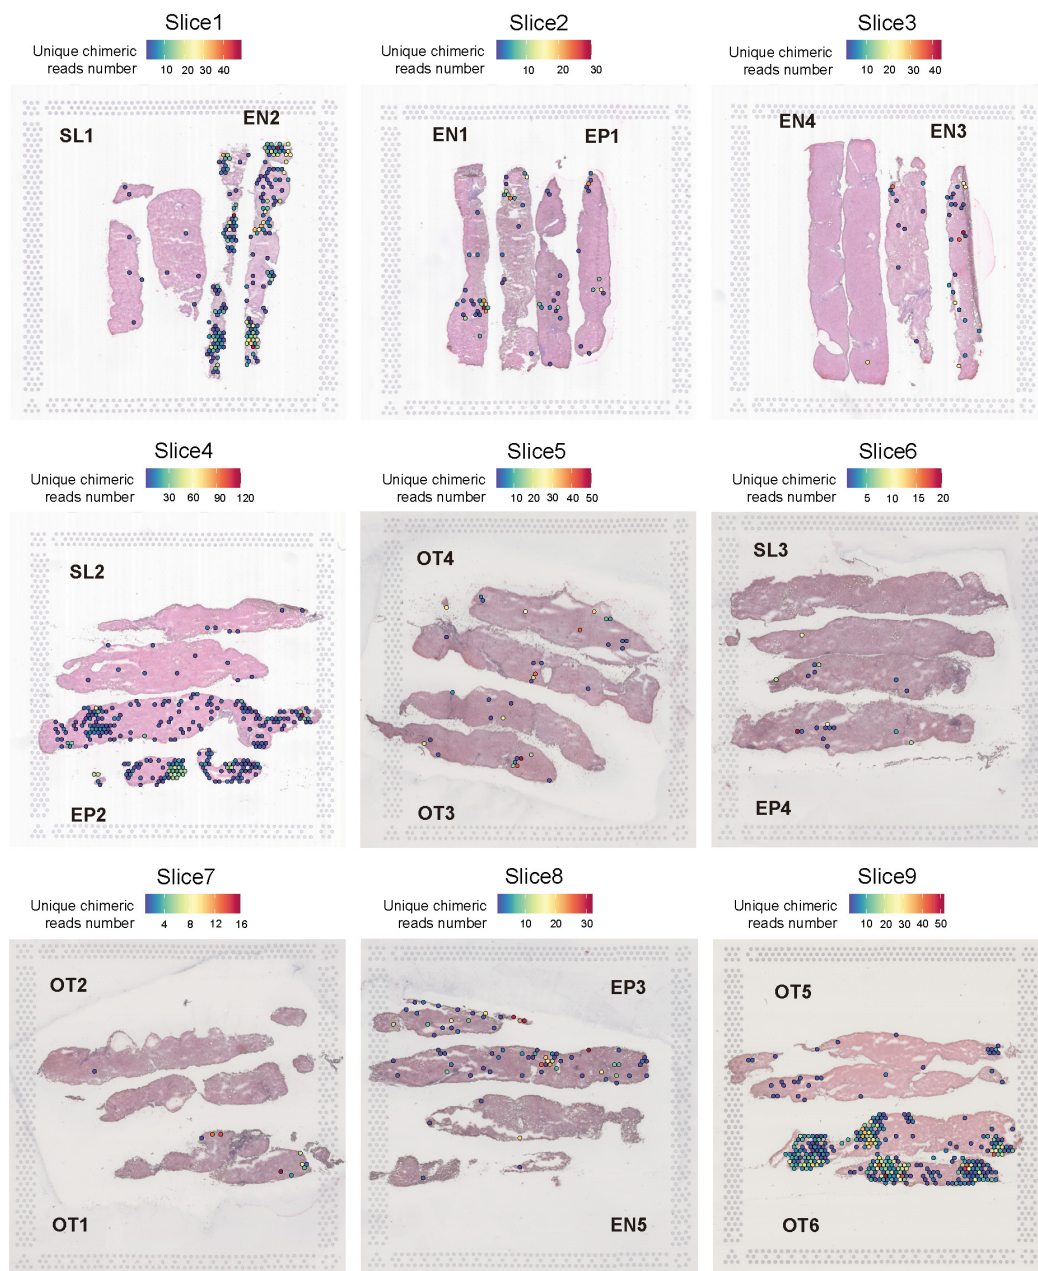

The density of unique chimeric reads in each spot was detected and displayed. EP, HBeAg-positive; EN, HBeAg-negative; OT, on-treatment; SL, HBsAg loss.

**Fig.S3 Spatial distribution and the density of distinct HBV integration events**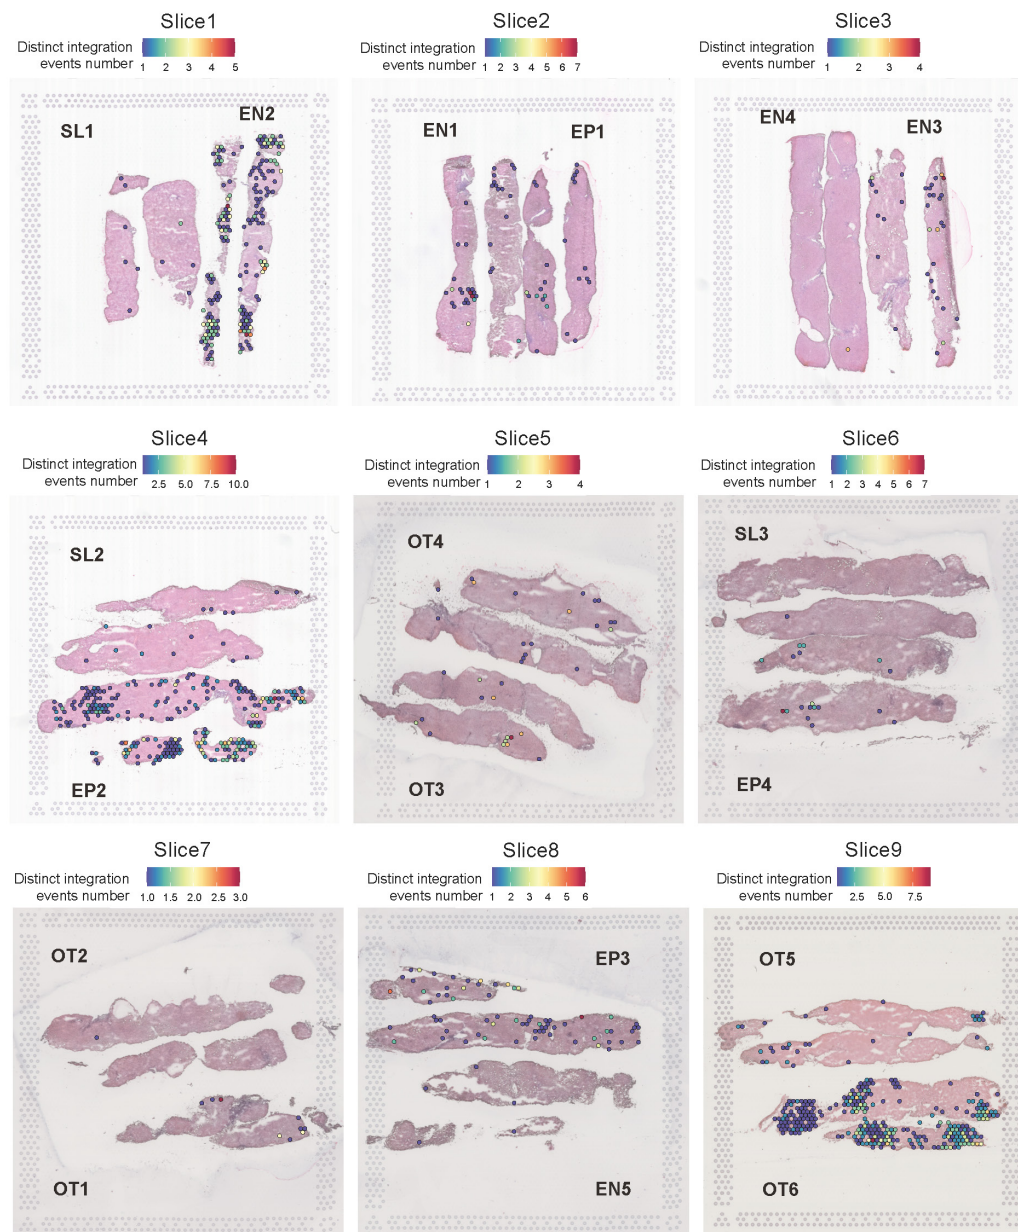

The density of distinct viral integration events in each spot was detected and displayed. EP, HBeAg-positive; EN, HBeAg-negative; OT, on-treatment; SL, HBsAg loss.

Fig.S4 Intrahepatic HBsAg and HBcAg immunostaining

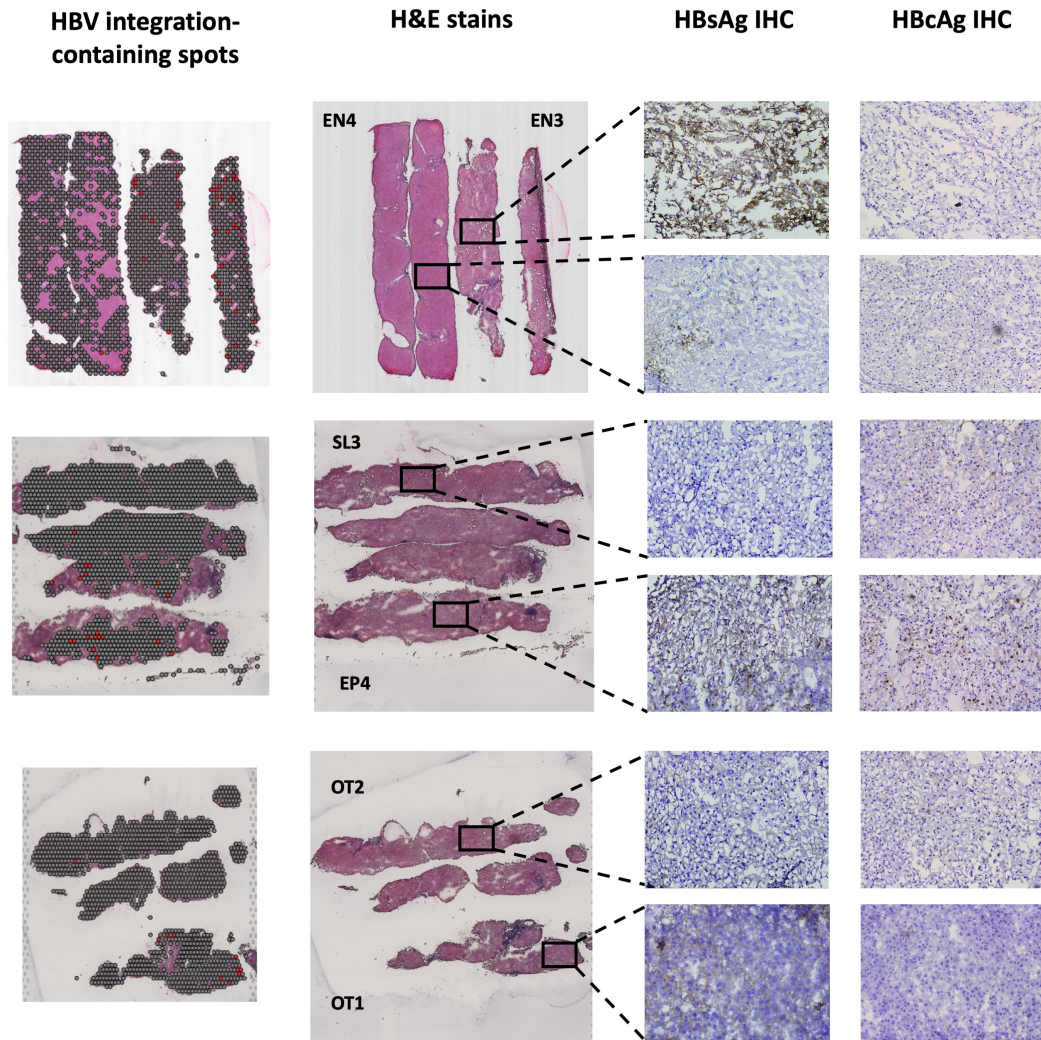

HBsAg and HBcAg IHC were performed on adjacent slices from the same OCT-embedded samples of patients with adequate liver sections. The IHC results are displayed with matched H&E staining and spatial plots showing the distribution of transcriptionally active HBV integration. Spots containing viral integration are highlighted in red. Brown, HBsAg or HBcAg; blue, nuclei. IHC, immunohistochemistry. EP, HBeAg-positive; EN, HBeAg-negative; OT, on-treatment; SL, HBsAg loss.

Fig.S5 The transcriptionally active HBV integrations sites on viral genome.

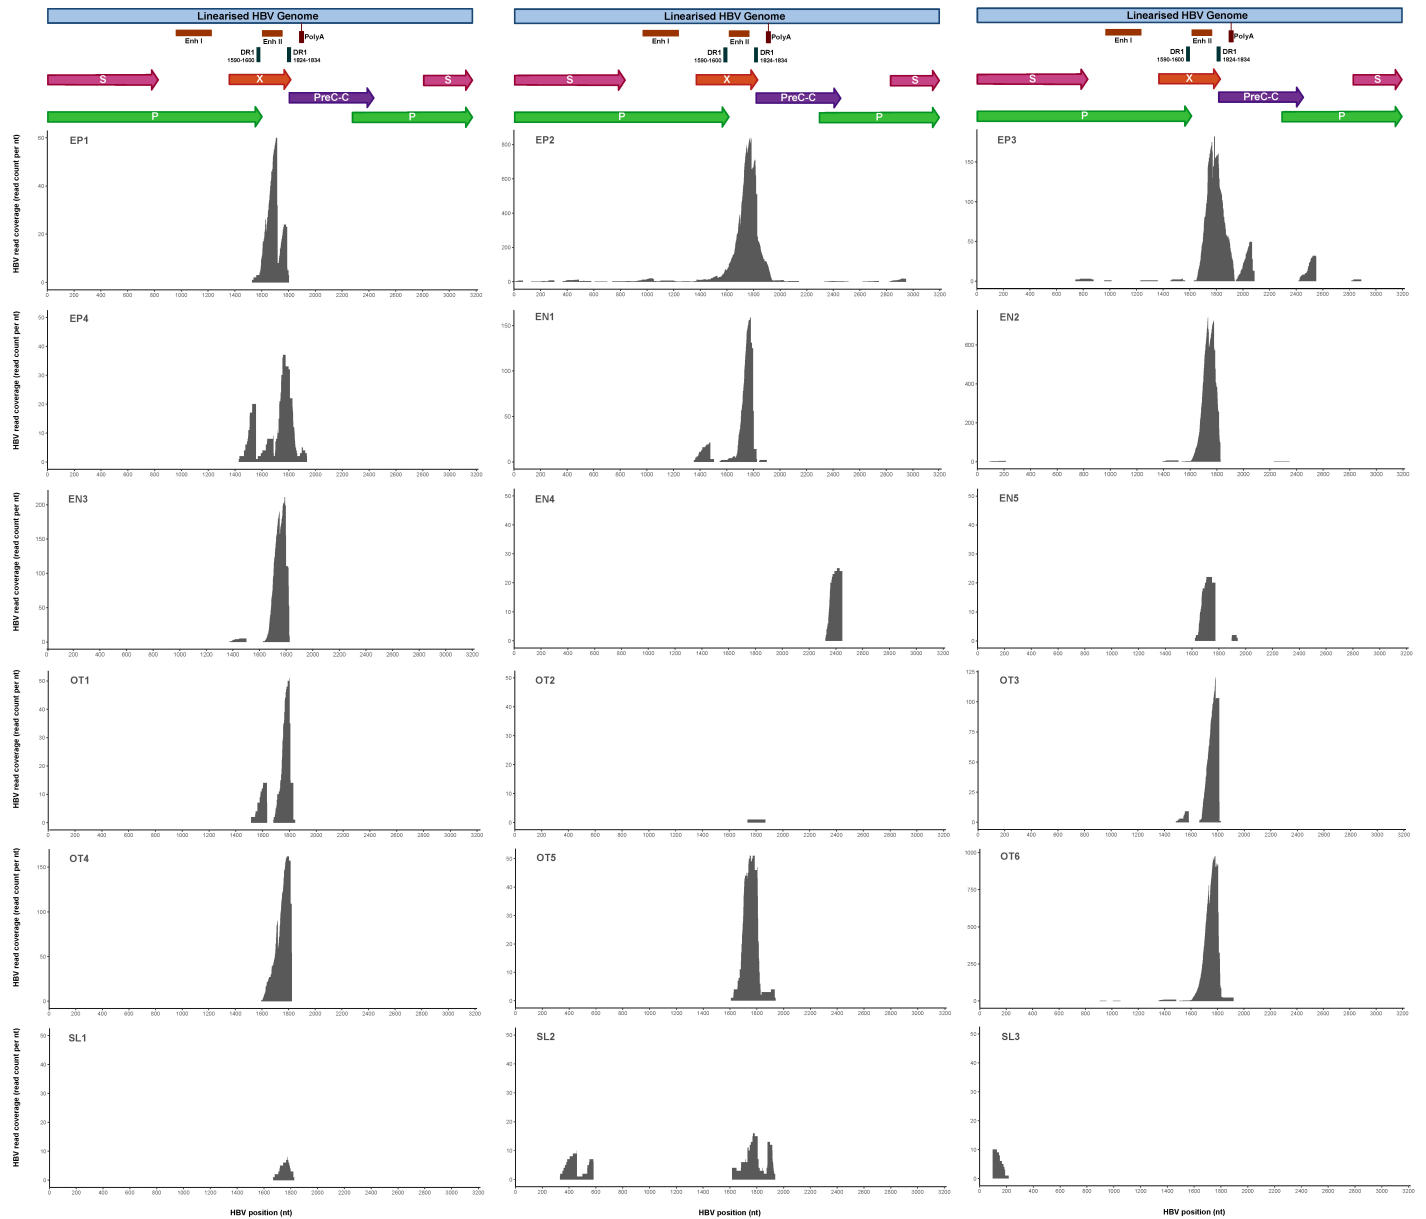

Histogram shows the frequency of transcriptionally active viral integration at each nucleotide position in the HBV genome for each patient. The locations of EnhI, EnhII, DR1, DR2, and the genes encoding HBV polymerase (green), core (violet), S (pink), and X (red) proteins are shown. Enh: enhancer; DR: direct repeat.



**Table S1. Primers and probes used for total HBV DNA and cccDNA quantification**

| Amplicon size (bp) | Name            | Sequence                           |
|--------------------|-----------------|------------------------------------|
| 149                | total HBV Fwd   | TGTGCCTTCTCATCTGCCG                |
|                    | total HBV probe | FAM-CGTGTGCACTTCGCTTCACCTCTGC-BHQ1 |
|                    | total HBV Rev   | GCCTCAAGGTCGGTCGTTGAC              |
| 308                | cccDNA Fwd      | CCGTGTGCACTTCGCTTCA                |
|                    | cccDNA probe    | FAM-CATGGAGACCACCGTGAACGCCC-BHQ1   |
|                    | cccDNA Rev      | GCACAGCTTGGAGGCTTGA                |
| 86                 | ACTB Fwd        | GGAAATCGTGCGTGACATTAAG             |
|                    | ACTB probe      | FAM-CTACGTCGCCCTGGACTTCG-BHQ1      |
|                    | ACTB Rev        | AGGAGCTGGAAGCAGCC                  |

Table S2. Patient characteristics

| Patient-ID                                  | Sex    | Age(y) | HBV DNA (IU/mL) | HBsAg (IU/mL) | HBeAg (S/CO) | ALT (IU/mL) | HBV Genotype | Inflammation Grade | Fibrosis Stage | Antiviral treatment                                                                            | Duration of treatment(y) | Known Duration of infection(y) |
|---------------------------------------------|--------|--------|-----------------|---------------|--------------|-------------|--------------|--------------------|----------------|------------------------------------------------------------------------------------------------|--------------------------|--------------------------------|
| <b>Untreated</b>                            |        |        |                 |               |              |             |              |                    |                |                                                                                                |                          |                                |
| <b>Indeterminate grey area</b>              |        |        |                 |               |              |             |              |                    |                |                                                                                                |                          |                                |
| EP1                                         | Male   | 42     | 1.47E+03        | 1.88          | 37.497       | 14          | B            | 1                  | 1              | Peg-IFN 1year<br>(>1 year before liver biopsy)                                                 |                          | >3                             |
| <b>HBeAg-positive chronic hepatitis B</b>   |        |        |                 |               |              |             |              |                    |                |                                                                                                |                          |                                |
| EP2                                         | Female | 38     | >1e8            | 40815         | 1528.762     | 56          | C            | 2                  | 1              | /                                                                                              | /                        | 19                             |
| EP3                                         | Male   | 38     | >1e8            | 88381         | 1510.695     | 52          | C            | 2                  | 1              | /                                                                                              | /                        | 21                             |
| EP4                                         | Female | 25     | >1e8            | 91085         | 1292.453     | 45          | B            | 2                  | 1              | /                                                                                              | /                        | >7                             |
| <b>HBeAg-negative chronic HBV infection</b> |        |        |                 |               |              |             |              |                    |                |                                                                                                |                          |                                |
| EN1                                         | Male   | 60     | 1.16E+04        | >250          | /            | NA          | B            | 1                  | 0~1            | /                                                                                              | /                        | 5                              |
| <b>HBeAg-negative chronic hepatitis B</b>   |        |        |                 |               |              |             |              |                    |                |                                                                                                |                          |                                |
| EN2                                         | Female | 29     | 6.62E+03        | 1994.03       | /            | 16          | C            | 2                  | 2              | /                                                                                              | /                        | >6                             |
| EN3                                         | Female | 56     | 3.53E+03        | 10986         | /            | 35          | C            | 2                  | 3~4            | /                                                                                              | /                        | 31                             |
| EN4                                         | Male   | 45     | 1.54E+04        | 262.66        | /            | 19          | B            | 2                  | 0              | NUC 1year<br>(6 years before liver biopsy) &<br>Peg-IFN 1year<br>(>1 year before liver biopsy) |                          | 21                             |

|                     |        |    |                    |                      |                      |           |   |        |        |                                                |      |     |
|---------------------|--------|----|--------------------|----------------------|----------------------|-----------|---|--------|--------|------------------------------------------------|------|-----|
| EN5                 | Male   | 34 | 5.39E+04           | 186.38               | /                    | 64        | B | 2      | 1      | Peg-IFN 1year<br>(>1 year before liver biopsy) | 34   |     |
| <b>On treatment</b> |        |    |                    |                      |                      |           |   |        |        |                                                |      |     |
| OT1                 | Male   | 47 | <50                | 500.83               | 1.388                | 39        | C | 1      | 0      | Peg-IFN<br>&NUC                                | 9.7  | 19  |
| OT2                 | Male   | 38 | <50                | 387.82               | /                    | 29        | C | 0      | 0      | NUC                                            | 8.1  | >10 |
| OT3                 | Male   | 40 | <50                | 4933.31              | 5.635                | 16        | C | 0      | 3      | NUC                                            | 4.4  | 6   |
| OT4                 | Female | 44 | <50                | 652.66               | /                    | 13        | B | 1      | 0      | NUC                                            | 8.0  | 9   |
| OT5                 | Female | 37 | <50<br>(7.91E+02)* | 2622.61<br>(5837.25) | /<br>(/)             | 65 (24)*  | C | 1 (2)* | 1 (1)* | Peg-IFN                                        | 1.6  | 20  |
| OT6                 | Female | 54 | <50<br>(>1e8)*     | 690.65<br>(8628.81)* | 2.166<br>(1987.395)* | 23 (115)* | C | 0 (2)* | 0 (1)* | NUC                                            | 4.2  | 25  |
| <b>HBsAg loss</b>   |        |    |                    |                      |                      |           |   |        |        |                                                |      |     |
| SL1                 | Female | 45 | <50                | /                    | /                    | 20        | B | 0      | 0      | NUC                                            | 15.8 | >20 |
| SL2                 | Male   | 39 | <50                | /                    | /                    | 48        | B | 1      | 1      | NUC                                            | 9.0  | 23  |
| SL3                 | Male   | 34 | <50                | /                    | /                    | 24        | B | 2      | 0      | Peg-IFN<br>&NUC                                | 15.4 | >16 |

ALT, alanine aminotransferase; NUC, nucleos(t)ide analogues; Peg-IFN, Pegylated infection. EP, HBeAg-positive; EN, HBeAg-negative; OT, on-treatment; SL, HBsAg loss.

\* Values in parentheses represent the baseline levels of each indicator before antiviral treatment.

**Table S3. Sample spatial transcriptomics sequencing data summary**

| <b>Slice</b> | <b>Number of Spots Under Tissue</b> | <b>Mean Reads per Spot</b> | <b>Median Genes per Spot</b> | <b>Number of Reads</b> | <b>Total Genes Detected</b> | <b>Median UMI Counts per Spot</b> |
|--------------|-------------------------------------|----------------------------|------------------------------|------------------------|-----------------------------|-----------------------------------|
| Slice1       | 1158                                | 162375                     | 2335                         | 188030823              | 19538                       | 9022                              |
| Slice1.1     | 1471                                | 135898                     | 2158                         | 199906112              | 20552                       | 7556                              |
| Slice1.2     | 1928                                | 121060                     | 1086                         | 233403706              | 18987                       | 2558                              |
| Slice1.3     | 1742                                | 141606                     | 2278                         | 246677994              | 21125                       | 9016                              |
| Slice1.4     | 1872                                | 115519                     | 1019                         | 216251180              | 18851                       | 2808                              |
| Slice1.5     | 2091                                | 86071                      | 839                          | 179973749              | 18218                       | 2104                              |
| Slice1.6     | 1213                                | 248348                     | 1065                         | 301246328              | 17934                       | 2943                              |
| Slice1.7     | 1274                                | 151990                     | 1346                         | 193634774              | 18364                       | 3882                              |
| Slice1.8     | 1574                                | 127584                     | 2877                         | 200817668              | 21073                       | 12032                             |

UMI, Unique Molecular Identifier.
